# Supplementary material for: Growth of climate change commitments from HFC banks and emissions
Source: Copernicus journal article supplement (doi:10.5194/acp-14-4563-2014), 2014-05-12
Supplement: Supplementary file 1 [file acp-14-4563-2014-supplement.pdf]

Supplement of Atmos. Chem. Phys., 14, 4563–4572, 2014  
<http://www.atmos-chem-phys.net/acp-14-4563-2014/>  
doi:10.5194/acp-14-4563-2014-supplement  
© Author(s) 2014. CC Attribution 3.0 License.

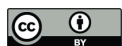

Atmospheric  
Chemistry  
and Physics  
Open Access

The logo for Atmospheric Chemistry and Physics, featuring a stylized globe with a grid pattern and a vertical line through it, positioned to the right of the text.

*Supplement of*

## **Growth of climate change commitments from HFC banks and emissions**

**G. J. M. Velders et al.**

*Correspondence to:* G. J. M. Velders ([guus.velders@rivm.nl](mailto:guus.velders@rivm.nl))

Table S1 Radiative forcing ( $\text{W m}^{-2}$ ) of baseline scenarios of CFCs and HCFCs, and of a reference scenarios and reduction scenarios of HFCs<sup>1</sup>. This data is shown graphically in Figures 4 and 5.

|      | CFCs | HCFCs | HFCs<br>Constant <sup>2</sup> | HFC production phaseout in                          |           |           |           |
|------|------|-------|-------------------------------|-----------------------------------------------------|-----------|-----------|-----------|
|      |      |       |                               | 2020                                                | 2030      | 2040      | 2050      |
| 1990 | 0.24 | 0.02  | 0                             |                                                     |           |           |           |
| 2010 | 0.26 | 0.05  | 0.01                          |                                                     |           |           |           |
| 2030 | 0.21 | 0.06  | 0.08-0.11                     | 0.04                                                |           |           |           |
| 2040 | 0.19 | 0.04  | 0.16-0.24                     | 0.03                                                | 0.08-0.11 |           |           |
| 2050 | 0.17 | 0.02  | 0.25-0.40                     | 0.02                                                | 0.06-0.09 | 0.15-0.24 |           |
| 2060 | 0.15 | 0.01  | 0.35-0.55                     | 0.01                                                | 0.04-0.06 | 0.11-0.18 | 0.24-0.38 |
| 2070 | 0.13 | <0.01 | 0.42-0.66                     | 0.01                                                | 0.03-0.04 | 0.08-0.13 | 0.18-0.28 |
| 2100 | 0.10 | 0     | 0.54-0.84                     | <0.01                                               | 0.01-0.02 | 0.03-0.05 | 0.07-0.11 |
|      |      |       |                               | HFC zero emissions in                               |           |           |           |
|      |      |       | Constant                      | 2020                                                | 2030      | 2040      | 2050      |
| 2030 |      |       | 0.08-0.11                     | 0.02                                                |           |           |           |
| 2040 |      |       | 0.16-0.24                     | 0.01                                                | 0.05-0.06 |           |           |
| 2050 |      |       | 0.25-0.40                     | 0.01                                                | 0.03-0.04 | 0.09-0.14 |           |
| 2060 |      |       | 0.35-0.55                     | 0.01                                                | 0.02-0.03 | 0.06-0.09 | 0.15-0.24 |
| 2070 |      |       | 0.42-0.66                     | <0.01                                               | 0.01-0.02 | 0.04-0.06 | 0.10-0.16 |
| 2100 |      |       | 0.54-0.84                     | 0                                                   | 0.01      | 0.02-0.03 | 0.04-0.06 |
|      |      |       |                               | Reduction from HFC bank destruction <sup>3</sup> in |           |           |           |
|      |      |       | Constant                      | 2020                                                | 2030      | 2040      | 2050      |
| 2030 |      |       | 0.08-0.11                     | 0.02                                                |           |           |           |
| 2040 |      |       | 0.16-0.24                     | 0.01-0.02                                           | 0.04-0.06 |           |           |
| 2050 |      |       | 0.25-0.40                     | 0.01                                                | 0.03-0.05 | 0.06-0.10 |           |
| 2060 |      |       | 0.35-0.55                     | 0.02                                                | 0.02-0.03 | 0.05-0.09 | 0.09-0.14 |
| 2070 |      |       | 0.42-0.66                     | <0.01                                               | 0.02      | 0.04-0.07 | 0.08-0.12 |
| 2100 |      |       | 0.54-0.84                     | 0                                                   | 0.01      | 0.01-0.02 | 0.03-0.05 |

1) A blank cell means that the value is identical to the scenario with constant HFC production past 2050.

2) The HFCs are the upper and lower reference scenarios from Velders et al. (2009). In these scenarios the HFC production past 2050 is constant at the 2050-level.

3) Destruction of the bank only. This scenario is the difference from the zero emissions and production phaseout scenario.

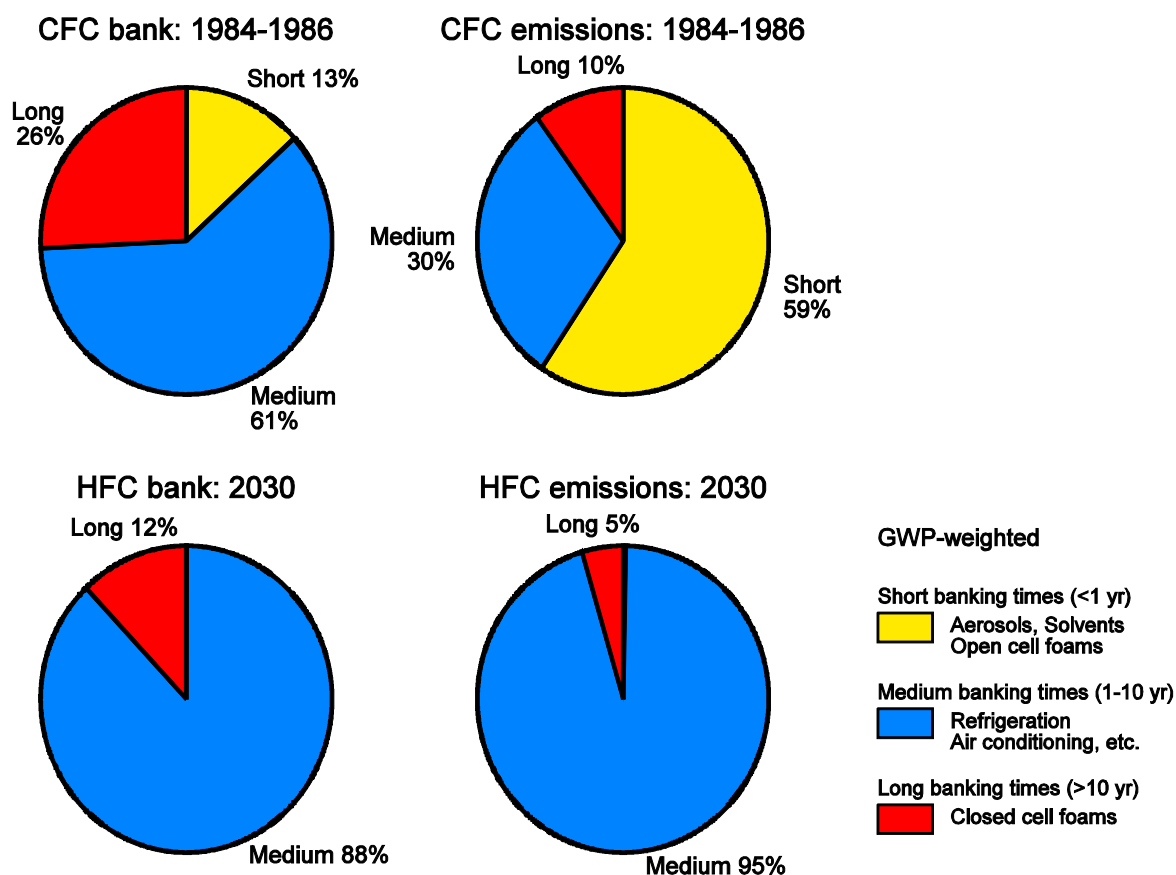

Figure S1 Contributions of different types of applications to the banks and emissions of CFCs in the mid-1980s and HFCs in 2030. The applications differ in the delay times between production and emission (banking times). The banks and emissions are GWP-weighted (100-yr time horizon). HFC banks and emissions are the average of the upper and lower scenarios for 2030 from Velders et al. (2009). The contribution of the very emissive applications (aerosols, solvents and open cell foams) is 0.01% for the GWP-weighted bank and 0.3% for the GWP-weighted emissions in 2030.

## Reference

Velders, G. J. M., Fahey, D. W., Daniel, J. S., McFarland, M., and Andersen, S. O.: The large contribution of projected HFC emissions to future climate forcing, *Proc. Nat. Acad. Sci.*, 106, 10949-10954, doi: 10.1073/pnas.0902817106, 2009.
